1 *Pseudomonas aeruginosa* isolates co-incubated with *Acanthamoeba castellanii*  
2 exhibit phenotypes similar to chronic cystic fibrosis isolates

3 Short title: Effects of adaptation to amoeba on phenotypes expressed by *P.*  
4 *aeruginosa*

5 Wai Leong<sup>1</sup>, Carla Lutz<sup>1</sup>, Jonathan Williams<sup>2,3</sup>, Yan Hong Poh<sup>1#a</sup>, Benny Yeo Ken Yee<sup>1,4</sup>, Cliff  
6 Chua<sup>1,4#b</sup>, Scott A. Rice<sup>1,4,6</sup>, Michael Givskov<sup>1,5</sup>, Martina Sanderson-Smith<sup>2,3</sup> and Diane  
7 McDougald<sup>1,6\*</sup>

8 <sup>1</sup>Singapore Centre for Environmental Life Sciences Engineering, Nanyang Technological  
9 University, Singapore

10 <sup>2</sup>Illawarra Health and Medical Research Institute, Wollongong, Australia

11 <sup>3</sup>School of Chemistry and Molecular Biosciences, Molecular Horizons, University of  
12 Wollongong, Australia

13 <sup>4</sup>School of Biological Sciences, Nanyang Technological University, Singapore

14 <sup>5</sup>Costerton Biofilm Center, Department of Immunology and Microbiology, University of  
15 Copenhagen, Copenhagen, Denmark

16 <sup>6</sup>The ithree Institute, University of Technology Sydney, Sydney, Australia

17 #aCurrent Address: Yale-NUS College, Singapore

18 #bCurrent Address: Environmental Health Institute, National Environment Agency, Singapore

19 \*Corresponding author

20 Email: MDIANE@ntu.edu.sg

## 21 **Abstract**

22 The opportunistic pathogen, *Pseudomonas aeruginosa*, is ubiquitous in the environment, and in  
23 humans is capable of causing acute and chronic infections. *P. aeruginosa*, when co-incubated  
24 with the bacterivorous amoeba, *Acanthamoeba castellanii*, for extended periods, produced  
25 genetic and phenotypic variants. Sequencing of late-stage amoeba-adapted *P. aeruginosa*  
26 isolates demonstrated single nucleotide polymorphisms within genes that encode known  
27 virulence factors, and this correlated with a reduction in expression of virulence traits. Virulence  
28 towards the nematode, *Caenorhabditis elegans*, was attenuated in late-stage amoeba-adapted *P.*  
29 *aeruginosa* compared to early stage amoeba-adapted and non-adapted counterparts. Late-stage  
30 amoeba-adapted *P. aeruginosa* lost competitive fitness compared to non-adapted counterparts  
31 when grown in nutrient rich media. However, non-adapted *P. aeruginosa* were rapidly cleared  
32 by amoeba predation, whereas late-stage amoeba-adapted isolates remained in higher numbers  
33 24 h after ingestion by amoeba. In addition, there was reduced uptake by macrophage of  
34 amoeba-adapted isolates and reduced uptake by human neutrophils as well as increased survival  
35 in the presence of neutrophils. Our findings indicate that the selection imposed by amoeba on *P.*  
36 *aeruginosa* resulted in reduced virulence over time. Importantly, the genetic and phenotypic  
37 traits possessed by late-stage amoeba-adapted *P. aeruginosa* are similar to what is observed for  
38 isolates obtained from chronic cystic fibrosis infections. This notable overlap in adaptation to  
39 different host types suggests similar selection pressures among host cell types.

## 40 **Author Summary**

41 *Pseudomonas aeruginosa* is an opportunistic pathogen that causes both acute infections in plants  
42 and animals, including humans and also causes chronic infections in immune compromised and

43 cystic fibrosis patients. This bacterium is commonly found in soils and water where bacteria are  
44 constantly under threat of being consumed by the bacterial predators, protozoa. To escape being  
45 killed, bacteria have evolved a suite of mechanisms that protect them from being consumed or  
46 digested. Here we examined the effect of long-term predation on the genotype and phenotypes  
47 expressed by *P. aeruginosa*. We show that long-term co-incubation with protozoa resulted in  
48 mutations in the bacteria that made them less pathogenic. This is particularly interesting as we  
49 see similar mutations arise in bacteria associated with chronic infections. Thus, predation by  
50 protozoa and long term colonization of the human host may represent similar environments that  
51 select for similar losses in gene functions.

52

## 53 **Introduction**

54 Many virulence traits of microorganisms are regulated in response to the environment in order to  
55 invade a host, obtain resources, defend against predation by heterotrophic protists, or establish a  
56 replication niche. The evolution of virulence, i.e. harm caused by a pathogen towards its host, is  
57 a long-standing subject of investigation with important implications for human health. Most  
58 opportunistic pathogens are not transmitted person to person but rather transit through the  
59 environment between hosts and therefore, it is unlikely that virulence traits evolve in the host (1-  
60 3). Rather, it is more likely that these traits evolve in the environment.

61 Predation by protists, or protozoa, is a major mortality factor for bacteria in the environment (4).  
62 Virulence traits, particularly those that cause human disease, are hypothesized to have evolved in  
63 response to and are maintained by predation pressure, which supports the “coincidental  
64 evolution” hypothesis. This hypothesis states that virulence is a coincidental consequence of  
65 adaptation to other ecological niches (5-7). Coincidental evolution is supported by examples of  
66 factors that play roles in both grazing resistance and virulence towards mammalian hosts (7-9),  
67 including traits such as cell-surface alterations, increased swimming speed, toxin release and  
68 biofilm formation (5, 7). Conversely, virulence traits may be attenuated or lost when organisms  
69 adapt to form a more commensal relationship with a host (10-12). Microorganisms may also  
70 develop specific virulence traits against a specific host becoming a specialist pathogen.

71 Although there are many hypotheses for how virulence traits evolve, there have been few studies  
72 on the adaptation of specific virulence traits to different host types and environments. Such  
73 studies are particularly important for understanding how opportunistic pathogens evolve (13).

74 *Pseudomonas aeruginosa* is a versatile opportunistic pathogen found in a wide variety of natural  
75 habitats. *P. aeruginosa* has a large (6.3 Mb) genome containing many genes for metabolism and  
76 antibiotic resistance (14), and coupled with a complex regulatory network allows it to effectively  
77 survive in a variety of niches. *P. aeruginosa* is an important pathogen, responsible for both acute  
78 nosocomial infections (15) and chronic infections in leg ulcers and particularly in the lungs of  
79 cystic fibrosis (CF) patients (16). In the CF lung, it has been shown to evolve towards a more  
80 commensal lifestyle by altering the expression of acute virulence traits such as motility, quorum  
81 sensing and toxin production (17). While there are many studies addressing the evolution of *P.*  
82 *aeruginosa* in the CF lung (17-19), there is less known about the impact of protozoan predation  
83 on the evolution of virulence. To address this lack of knowledge, this study investigated the  
84 adaptation of *P. aeruginosa* during long-term co-incubation with the amoeba predator,  
85 *Acanthamoeba castellanii*. *P. aeruginosa* was co-incubated with *A. castellanii* for 42 days and  
86 the impact of co-incubation assessed using a range of phenotypes, including virulence in a  
87 *Caenorhabditis elegans* infection model. Adapted populations were also sequenced to  
88 investigate the range of mutations that occurred during co-incubation.

## 89 **Results**

### 90 **Genotypic changes in adapted strains**

91 The number of synonymous and non-synonymous single nucleotide polymorphisms (sSNPs and  
92 nsSNPs, respectively) occurring in amoeba-adapted and non-adapted populations were  
93 determined. There were 54 nsSNPs and 17 sSNPs detected in the 42 d adapted populations and

94 65 nsSNPs and 19 sSNPs detected in the 42 d non-adapted populations compared to the parent  
95 strain. The genes that contained nsSNPs were grouped into gene functions based on Clusters of  
96 Orthologous Groups (COGs) and were distributed into 14 COG categories (Fig 1). Mutations in  
97 genes involved in transcription occurred in equal numbers in adapted and non-adapted  
98 populations. In contrast, nsSNPs in coenzyme metabolism, lipid metabolism, cell motility and  
99 secondary metabolite production occurred solely within the amoeba-adapted population, while  
100 COGs representing inorganic ion transport and energy production were over-represented in the  
101 non-adapted population (Fig 1).

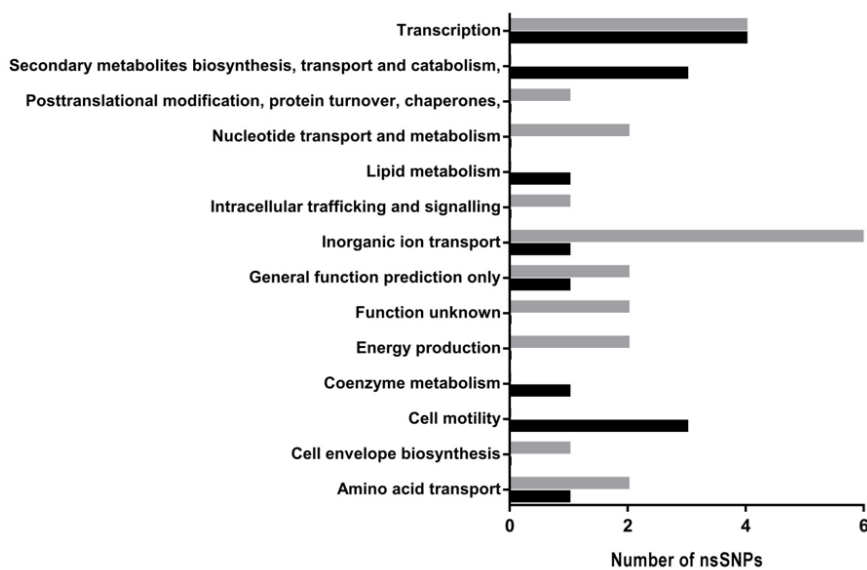

102

103 **Fig 1. Gene classifications.** Classification of genes containing nsSNPs grouped by COG  
104 functional class for amoeba-adapted (black bars) and non-adapted (grey bars) populations.

105 The following nine genes were independently mutated in all three amoeba-adapted replicate  
106 populations: the virulence regulator *vreA*, chemotaxis genes *pctB* and PA3349,

107 lipopolysaccharide biosynthetic gene *lpxO2*, *ppiA* and *polA* involved in translation, a cytochrome  
108 oxidase *ccpR*, the siderophore *fvbA*, and the hypothetical protein PA3638. The mutations with  
109 the highest frequency in the amoeba-adapted populations occurred within motility genes,  
110 however mutations in different genes were responsible for the loss of motility observed in the  
111 replicate experimental populations. For example, in population 1, 55.17 % of the reads in the  
112 *flgF* gene and 34.63 % of the reads in *flgH* contained a nsSNP. Amoeba-adapted populations 2  
113 and 3 contained considerable variation in the gene encoding *flgK*, where 42.31 % of the *flgK*  
114 reads from population 2 contained nsSNPs and 96.43 % of *flgK* reads from population 3  
115 contained a gene deletion. In addition to flagellar-mediated motility, all 42 d amoeba-adapted  
116 populations contained deletions or SNPs within genes associated with twitching motility,  
117 specifically 39.53 % of reads encoding *pilN*, 46.43 % reads encoding *pilM* and 25.53 % of reads  
118 encoding *pilT* were detected in population 1, 2 and 3 respectively. Further details about the gene  
119 function, frequency of SNPs and codon/amino acid substitution can be found in Table 1.

120 Analysis using DAVID functional tools predicted that the second unique biological process  
121 affected by SNPs as a result of long-term adaption with amoeba is the biosynthesis, transport and  
122 catabolism of secondary metabolites. All 42 d amoeba-adapted populations contain SNPs in  
123 *pvdJ* or *pvdD* and these mutations are predicted to affect the synthesis of pyoverdine.  
124 Additionally, in an analysis of the 42 d amoeba-adapted populations, *yfiH* and *yafE* were also  
125 categorized under secondary metabolite synthesis (20). Non-synonymous SNPs within these  
126 genes may further prevent synthesis of secondary metabolites.

127 **Effect of co-incubation of *P. aeruginosa* with *A. castellanii* on motility**

128 The mutations with the highest frequency in the amoeba-adapted populations occurred within  
129 motility genes. Thus, swimming, swarming and twitching motility of the isolates from adapted  
130 and non-adapted populations were compared. The long-term co-incubation of *P. aeruginosa*  
131 with amoeba resulted in a reduction in twitching motility (Fig 2a;  $F_{2, 534} = 295.1$ ,  $p < 0.001$ ). *P.*  
132 *aeruginosa* isolates from the 3 d amoeba-adapted and non-adapted populations did not differ  
133 significantly ( $p = 0.53$ ), however, after 24 d twitching was significantly reduced compared to the  
134 non-adapted isolates ( $p < 0.001$ ) and in the 42 d population, the mean twitching motility of  
135 amoeba-adapted isolates was 10-fold less than isolates that were incubated in the absence of *A.*  
136 *castellanii* ( $p < 0.001$ ).

137 Co-incubation with *A. castellanii* also resulted in a decrease in swimming motility (Fig 2b;  $F_{2, 534}$   
138  $= 15.6$ ,  $p < 0.001$ ), where *P. aeruginosa* isolates from 3 d amoeba-adapted populations had a  
139 swim area of half that of isolates from non-adapted populations ( $p < 0.001$ ). This pattern of  
140 reduced swimming motility was observed for amoeba-adapted isolates from the 24 and 42 d  
141 populations as well ( $p < 0.001$  and  $p < 0.001$ , respectively).

142 *P. aeruginosa* isolates demonstrated a reduction in swarming motility as a result of co-incubation  
143 with amoeba, which varied over time in a non-linear fashion (Fig 2c;  $F_{2, 534} = 7.597$ ,  $p < 0.001$ ).  
144 Swarming was significantly reduced in isolates from amoeba-adapted populations at days 3 and  
145 24 ( $F_{1, 534} = 21.73$ ,  $p < 0.001$ ). Post hoc analysis shows that after 3 d of co-incubation the  
146 swarming distance of non-adapted isolates of *P. aeruginosa* was twice that of amoeba-adapted  
147 isolates ( $p > 0.001$ ). After 24 d of co-incubation the swarming distance exhibited by *P.*  
148 *aeruginosa* isolates derived from amoeba-adapted and non-adapted populations were further



149 reduced, however, there is still a significant reduction in swarming of amoeba-adapted isolates  
150 compared to non-adapted isolates ( $p < 0.001$ ). After 42 d there was no significant difference  
151 between the average swarming motility of isolates from either population ( $p = 0.189$ ).

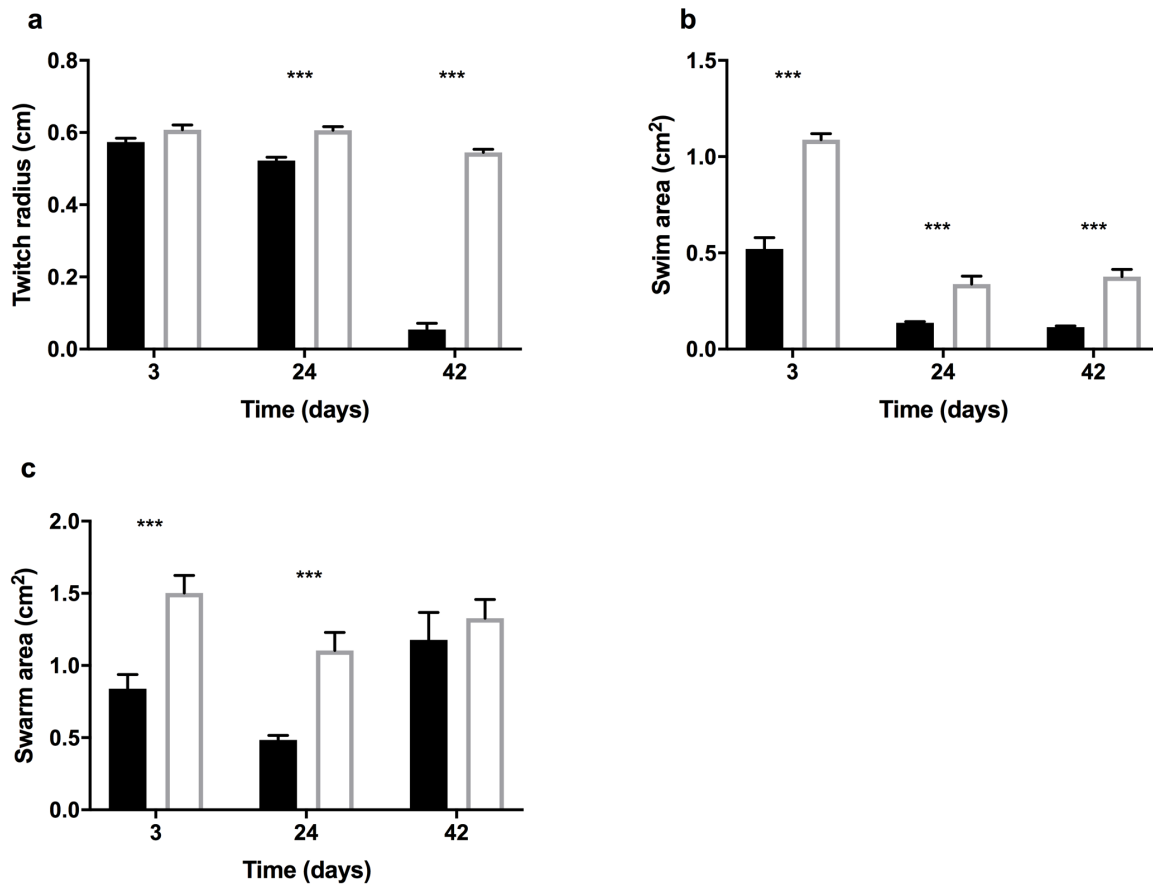

152

153 **Fig 2. Effect of co-incubation of *P. aeruginosa* with *A. castellanii* on motility.** Twitching (a),  
154 swimming (b) and swarming motility (c) of *P. aeruginosa* isolates derived from amoeba-adapted  
155 (closed) and non-adapted (open) isolates on days 3, 24 and 42. Data are presented as Means  $\pm$   
156 SEM. \*\*\*  $p < 0.001$ .

## 157 **Biofilm formation and planktonic growth of isolates from adapted populations**

158 As flagella and pili also impact biofilm formation, biofilm biomass and planktonic growth rates  
159 of adapted and non-adapted isolates were compared. Co-incubation of *P. aeruginosa* with *A.*  
160 *castellanii* had a significant effect on *P. aeruginosa* surface colonization (Fig 3a;  $F_{2, 354} = 15.7$ ,  $p$   
161  $< 0.001$ ). Post hoc analysis revealed no difference between treatments after 3 d ( $p = 0.998$ ).  
162 However, *P. aeruginosa* from amoeba-adapted day 24 populations formed 10-fold less biofilm  
163 than isolates from non-adapted day 24 populations ( $p < 0.001$ ). Although the average biomass  
164 of biofilms formed by the amoeba-adapted isolates increased after 42 d of co-incubation with  
165 amoeba, biofilm biomass remained 2-fold lower than that of the non-adapted population ( $p <$   
166  $0.001$ ). Additionally, the presence of amoeba exerted a strong negative effect on the planktonic  
167 growth of *P. aeruginosa* isolates derived from the amoeba-adapted population (Fig 3b;  $F_{1, 354} =$   
168  $29.6$ ,  $p < 0.001$ ). The planktonic growth rate of *P. aeruginosa* after 3 d was the same regardless  
169 of the population ( $p = 0.56$ ). However, after 24 and 42 d of amoebal-driven selection the  
170 planktonic growth rate of amoeba-adapted derived isolates was significantly less than the non-  
171 adapted isolates ( $p < 0.05$  and  $p < 0.001$  respectively).

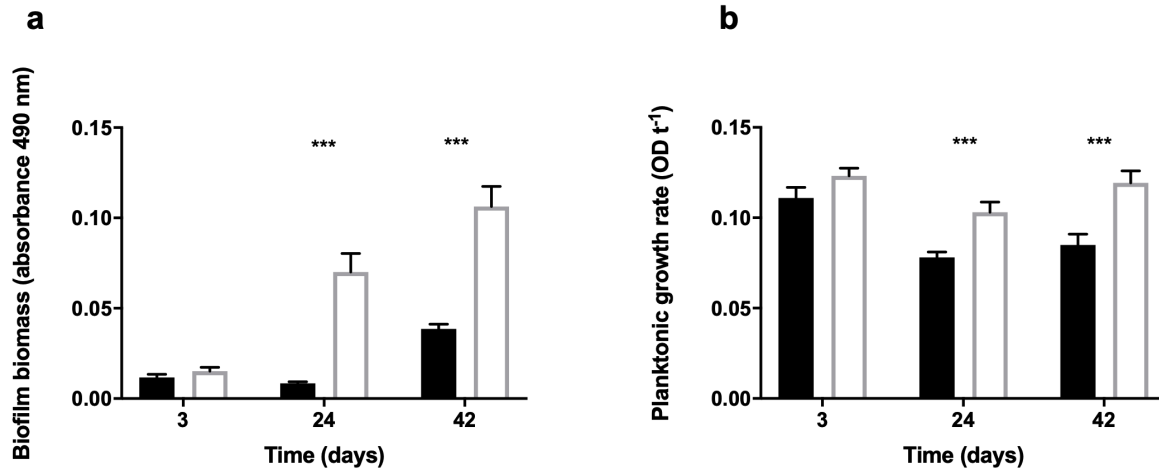

172

173 **Fig 3. Effect of co-incubation of *P. aeruginosa* with *A. castellanii* on biofilm formation and**  
174 **growth.** Biofilm biomass (a) and planktonic growth rates (b) of *P. aeruginosa* amoeba-adapted  
175 (closed) and non-adapted (open) isolates obtained from 3, 24 and 42 d populations when grown  
176 in LB<sub>10</sub> media at 37°C. Data are presented as Means ± SEM. \*\*\* p < 0.001.

### 177 Quantification of pyoverdine and rhamnolipids

178 *P. aeruginosa* isolates obtained after co-incubation with *A. castellanii* produced reduced  
179 quantities of pyoverdine compared to isolates from non-adapted populations (Fig 4a;  $F_{1, 174} =$   
180 45.74,  $p < 0.001$ ). Although pyoverdine production was reduced in both amoeba-adapted and  
181 non-adapted populations ( $F_{2, 174} = 12.08$ ,  $p < 0.001$ ), the concentration of pyoverdine in  
182 supernatants from amoeba-adapted isolates from 3 d populations was reduced 2-fold compared to  
183 non-adapted isolates ( $p < 0.001$ ) and was further reduced after 24, and 42 days of selection ( $p <$   
184 0.001).

185 Rhamnolipid production varied within the 42 d amoeba-adapted and non-adapted isolates but  
186 amoeba-adapted isolates produced less rhamnolipid overall when compared with the non-adapted  
187 population (Fig 4b;  $t_{16} = 2.571$ ,  $p = 0.0205$ ).

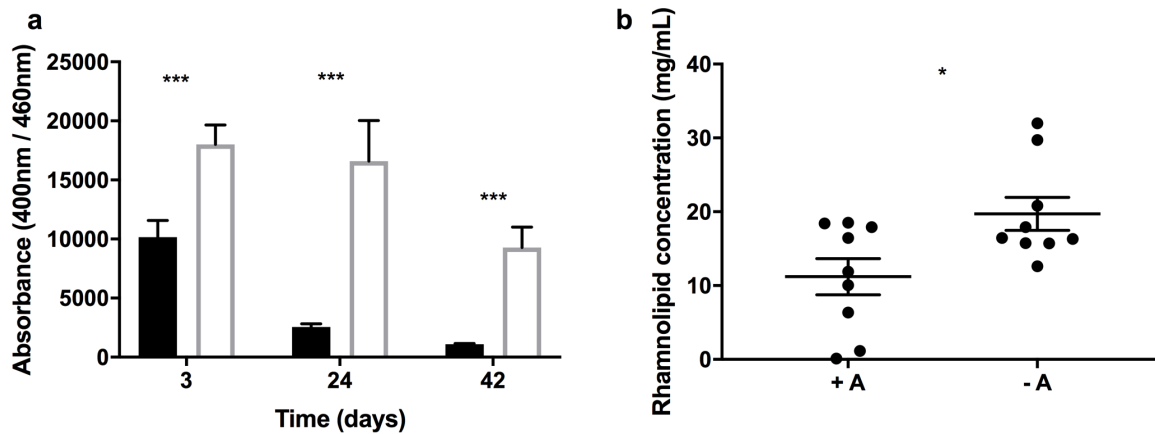

188

189 **Fig 4. Effect of co-incubation of *P. aeruginosa* with *A. castellanii* on pyoverdine and**  
190 **rhamnolipid production.** Quantification of pyoverdine (a) in supernatants from *P. aeruginosa*  
191 isolates obtained from amoeba-adapted (closed) and non-adapted (open) populations from days  
192 3, 24 and 42. Quantification of rhamnolipids (b) in supernatants from *P. aeruginosa* isolates  
193 obtained from day 42 amoeba-adapted (+A) and non-adapted (- A) isolates using the orcinol  
194 method, with a correction factor of 2.5. Data are presented as Means  $\pm$  SEM. \*  $p < 0.05$  \*\*\*  $p <$   
195 0.001.

196 **Amoeba-adapted *P. aeruginosa* are more competitive than non-adapted isolates when**  
197 **grown with amoeba**

198 To investigate whether adaptation with amoeba confers a fitness advantage to *P. aeruginosa*  
199 when grown with amoeba, we mixed fluorescent-tagged amoeba-adapted and non-adapted  
200 isolates and grew them together with amoeba. After 48 h co-incubation with amoeba, the  
201 proportion of amoeba-adapted cells is always higher when both amoeba-adapted::GFP (Fig 5a;  
202  $F_{1,4} = 95.27$ ,  $p = 0.000617$ ) and amoeba-adapted::mCherry (Fig 5b;  $F_{1,4} = 11.85$ ,  $p = 0.0262$ ) are  
203 competed with the reciprocally tagged non-adapted strain, compared to no amoeba controls.

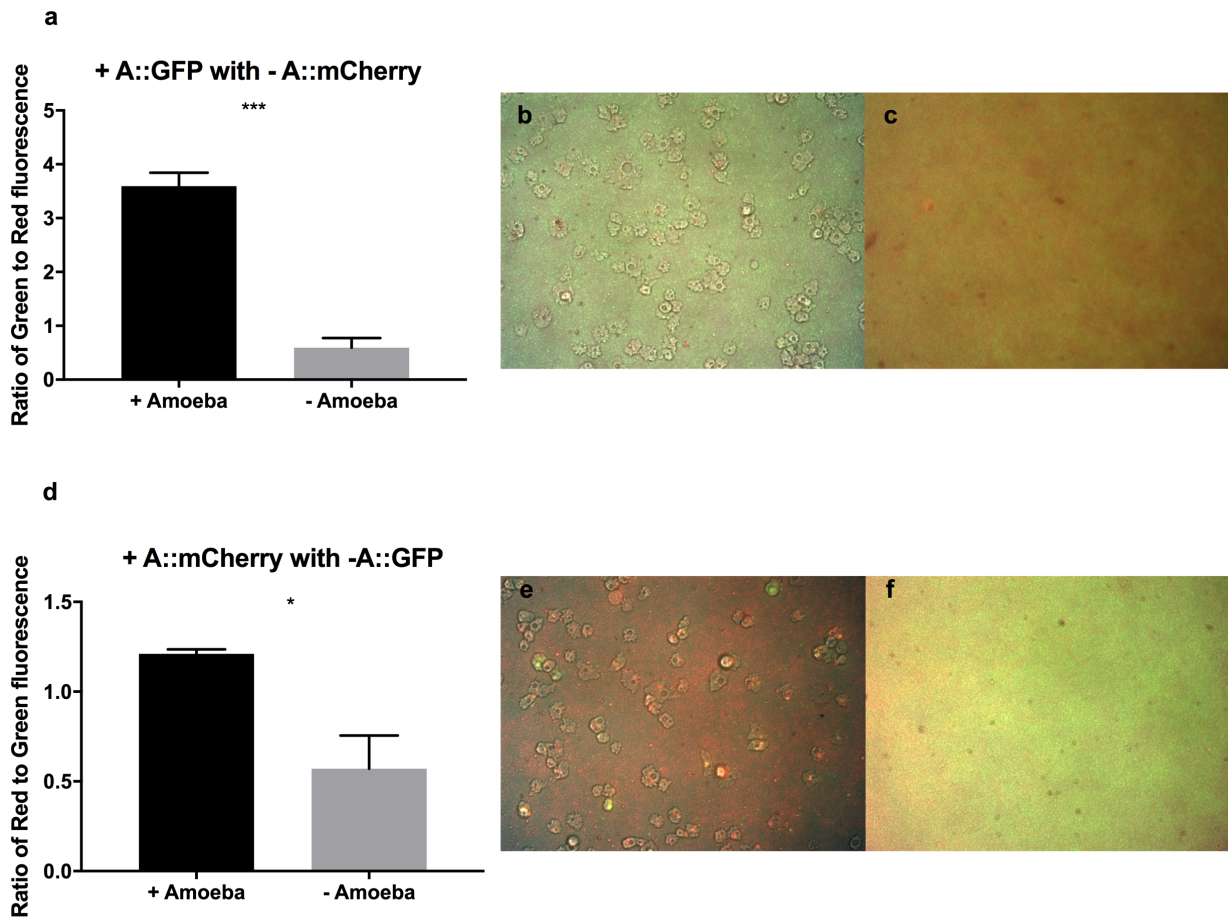

204

205 **Fig 5. Competition of amoeba-adapted and non-adapted *P. aeruginosa* grown with amoeba**

206 The fluorescence ratios of Day 42 + A::GFP *P. aeruginosa* mixed with – A::mCherry (a,b,c) and  
207 + A::mCherry with – A::GFP (d,e,f) after 48h of incubation with (black bars, b, e) and without  
208 (grey bars, c, f) *A. castellanii*. Data are presented as Means  $\pm$  SEM. \*  $p < 0.05$ , \*\*\*  $p < 0.001$ .

## 209 **Growth of amoeba-adapted and non-adapted *P. aeruginosa* in media or media** 210 **supplemented with amoeba supernatant**

211 To investigate whether the amoeba-adapted strains were utilizing amoeba secretions to out-  
212 compete the non-adapted strains, 9 randomly selected amoeba-adapted and non-adapted isolates  
213 were grown with and without the addition of amoeba supernatant to the growth media. The  
214 addition of amoeba supernatant to the growth media resulted in specific growth rate increases of  
215 -0.02 to 0.04 by 42 d amoeba-adapted and non-adapted *P. aeruginosa* isolates compared to the  
216 minimal media supplemented with the same amount of glucose. There was no significant  
217 difference in growth between amoeba-adapted and non-adapted isolates when grown in amoeba  
218 supernatant (Fig 6;  $t_{12} = 0.5147$ ,  $p = 0.5147$ ).

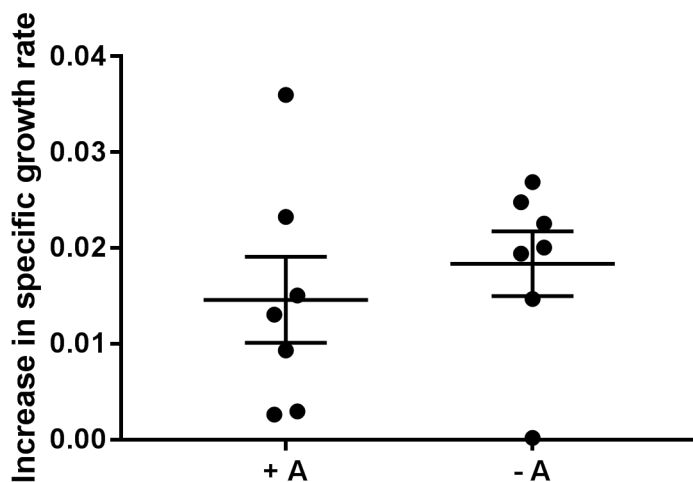

219

220 **Fig 6. Growth of amoeba-adapted and non-adapted isolates in media supplemented with**  
221 **amoeba supernatant.** Increase in specific growth rate of day 42 amoeba-adapted and non-  
222 adapted *P. aeruginosa* populations in M9 salts + 0.04% glucose supplemented with amoeba  
223 supernatant compared to no addition (n=9). Data are presented as Means  $\pm$  SEM. No significant  
224 difference was observed in amoeba-adapted isolates.

225 **Amoeba-adapted *P. aeruginosa* isolates exhibit reduced uptake by and enhanced survival**  
226 **within amoeba and macrophages**

227 Since the enhanced fitness of amoeba-adapted isolates in the presence of amoeba was not due to  
228 increased growth rate, the intracellular survival of 42 d amoeba-adapted and non-adapted  
229 populations were determined using a modified gentamicin protection assay. Intracellular CFUs 3  
230 h after infection of non-adapted isolates within amoeba were higher than amoeba-adapted CFUs,  
231 however, after 24 h the numbers of surviving intracellular non-adapted cells had decreased and  
232 were comparable to the amoeba-adapted numbers (Fig 7a; Adaptation $\times$ Time  $F_{1,32} = 14$ ,  $p <$   
233  $0.001$ ). The same trend was observed when the assay was conducted with raw 264.7  
234 macrophages. There was a significant interaction of amoeba adaptation and incubation time (Fig  
235 7b; Adaptation $\times$ Time  $F_{4,64} = 6.692$ ,  $p < 0.001$ ), with a higher initial uptake of 42 d non-adapted  
236 populations compared to the amoeba adapted strains, resulting in higher initial intracellular CFU  
237 counts, followed by a constant decrease in viable intracellular numbers between 5 and 18 h post-  
238 infection. The 42 d amoeba-adapted populations were taken up by macrophage in lower initial  
239 numbers, and the number of viable intracellular CFUs did not decrease to the same extent as the  
240 non-adapted populations, resulting in comparable numbers at 18 h post-infection. At 24 h post-

241 infection, macrophage cells infected with non-adapted *P. aeruginosa* exhibited morphological  
242 changes and appeared similar to those infected with the wild type strain (Fig 7c). Propidium  
243 iodide staining showed that many of these macrophages were dead. In contrast, macrophage  
244 infected with amoeba-adapted *P. aeruginosa* exhibited a more normal morphology, with fewer  
245 cells taking up the propidium iodide stain.

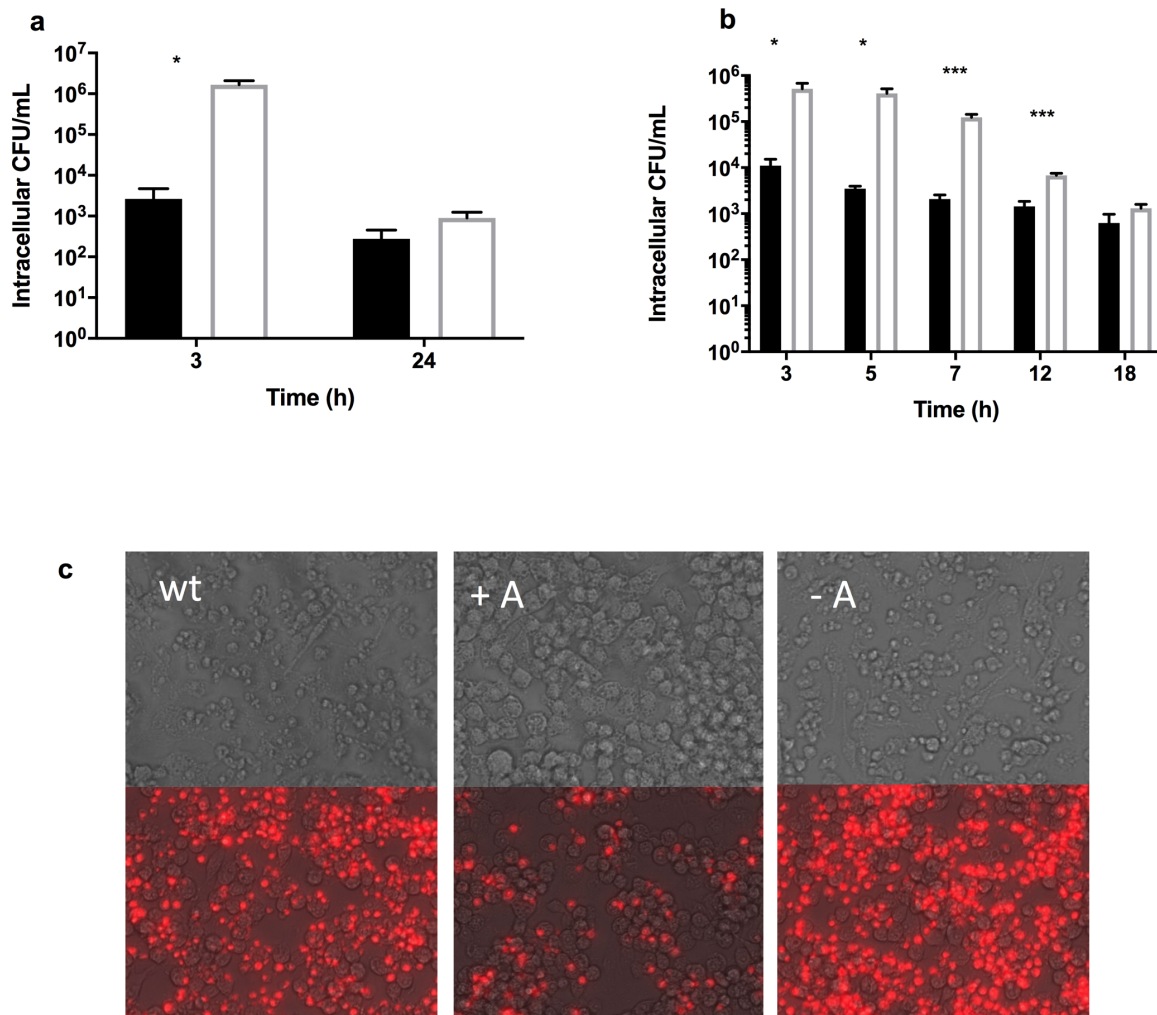

246

247 **Fig 7.** Intracellular survival of day 42 amoeba-adapted (closed) and non-adapted (open) strains  
248 in CFU ml<sup>-1</sup> over time in a modified gentamicin protection assay (log-scale, n=3) conducted with



249 (a) amoeba and (b) macrophage cells. Data are presented as Means  $\pm$  SEM. \* $p < 0.05$ ; \*\*\*  $p <$   
250 0.001. (c) Propidium iodide staining of raw 264.7 macrophage cells 24 h after infection with wild  
251 type, day 42 amoeba-adapted (A+) and non-adapted (-A) *P. aeruginosa*. Images are shown with  
252 and without the fluorescence to better illustrate changes in cell morphology.

253 **Amoeba-adapted *P. aeruginosa* isolates exhibit reduced uptake and enhanced survival in**  
254 **the presence of neutrophils**

255 In order to determine if the intracellular survival of amoeba –adapted cells extends to other  
256 phagocytic cell types, we compared the ability of adapted and non-adapted *P. aeruginosa* to  
257 survive in the presence of human neutrophils. The internalization of 42 d amoeba-adapted and  
258 non-adapted populations were determined using a modified gentamicin protection assay.  
259 Intracellular CFUs 2 h after infection of non-adapted isolates within neutrophils were higher than  
260 amoeba-adapted CFUs (Fig 8a). Amoeba-adapted strains also had increased survival against  
261 human neutrophils when compared to non-adapted isolates (Fig 8b).

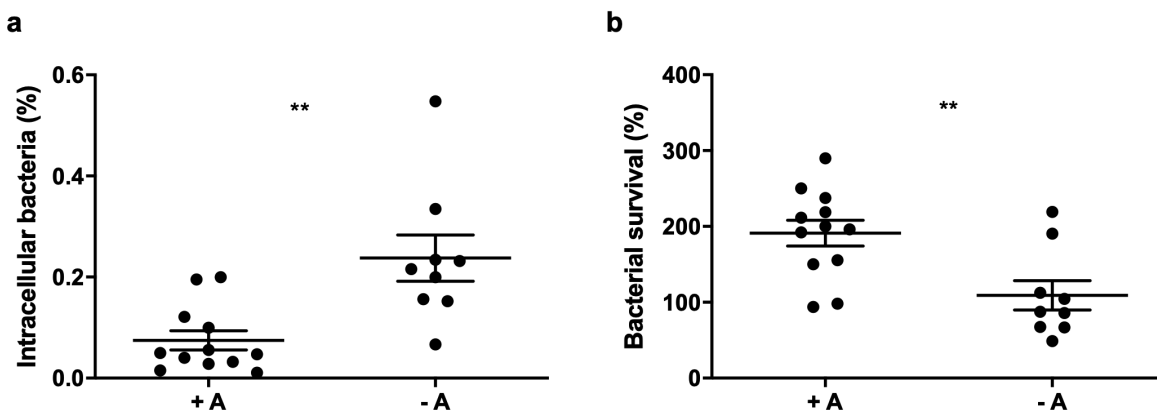

262

263 **Fig 8.** Amoeba-adapted *P. aeruginosa* exhibits reduced uptake by and enhanced survival in the  
264 presence of human neutrophils. Survival of day 42 day (+ A) amoeba-adapted (4) and (- A) non-  
265 adapted (3) strains following incubation with human neutrophils where bacterial (a) uptake and  
266 (b) survival were determined. Counts were performed in triplicate and results are the pooled  
267 means  $\pm$  SEM from individual experiments using 3 different donors. Groups were analysed via  
268 student T test. \*\* $p < 0.01$

269 ***P. aeruginosa* populations co-incubated with *A. castellanii* show reduced virulence**

270 Most of the phenotypes explored above play a role in the pathogenesis of *P. aeruginosa*.  
271 Therefore, we tested for virulence in *Caenorhabditis elegans* fast and slow kill assays. The  
272 isolates derived from amoeba-adapted populations after 3 d co-incubation were significantly  
273 more toxic to nematodes compared to non-adapted populations, although nematodes exposed to  
274 isolates from both populations had a median survival of 8 h (Fig 9a;  $\chi^2(1, n = 54) = 31.77, p <$   
275  $0.001$ ). *C. elegans* feeding on isolates from the 42 d non-adapted populations survived longer  
276 than when feeding on isolates from the day 3 populations. Furthermore, isolates from the 42 d  
277 amoeba-adapted populations were significantly less toxic to *C. elegans* compared to their non-  
278 adapted counterparts in both fast kill (Fig 9b;  $\chi^2(1, n = 54) = 140.7, p < 0.0001$ ) and slow kill  
279 assays (Fig 9c;  $\chi^2(1, n = 54) = 23.52, p < 0.0001$ ).

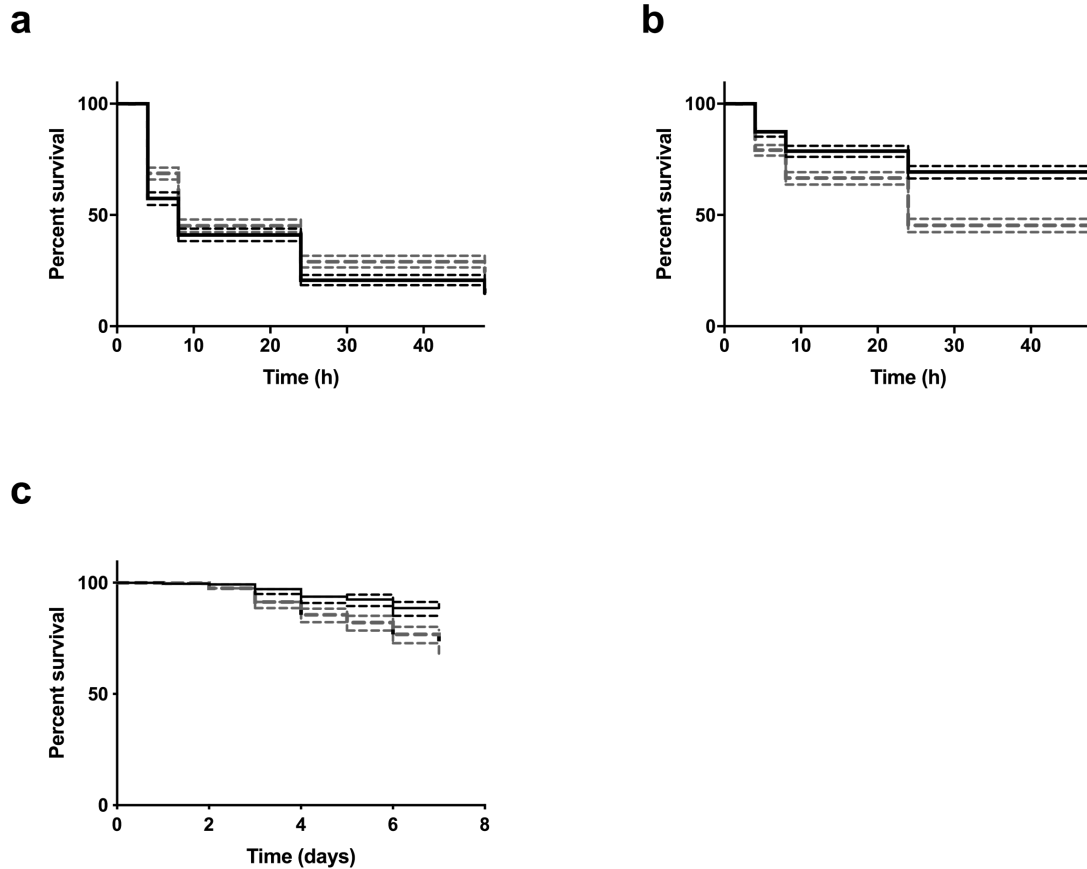

280

281 **Fig. 9. Effect of co-incubation of *P. aeruginosa* with *A. castellanii* in the *C. elegans***  
282 **virulence assay.** *C. elegans* survival curves after exposure to *P. aeruginosa* isolates derived  
283 from amoeba-adapted (black solid bars) or non-adapted (grey dashed bars) populations taken  
284 after 3 (a) or 42 (b) d for 0, 4, 8, 24 and 48 h in a fast kill assay. (c) Percent survival of *C.*  
285 *elegans* exposed to day 42 isolates of amoeba adapted and non-adapted *P. aeruginosa*  
286 populations over 7 days in a slow kill assay. Dotted lines indicate 95% CI.

287 **Discussion**

288 Most opportunistic pathogens are not transmitted person to person but rather transit through the  
289 environment between hosts and therefore, it is likely that the environment plays a significant role  
290 in evolution of protective traits. Predation by protists is one of the major mortality factors for  
291 bacteria in the environment and it is likely that traits that protect against predation may also  
292 impact human hosts during infection (1-3). *P. aeruginosa* is responsible for a variety of  
293 nosocomial acute as well as chronic infections (15) in particular chronic lung infections in CF  
294 patients (16). Here we investigated the phenotypic and genotypic changes that occur during co-  
295 incubation of *P. aeruginosa* with *A. castellanii* for 42 days with a focus on virulence traits.  
296 Populations were collected on days 3, 24 and 42 and individual isolates were randomly collected  
297 at each time point.

#### 298 **Motility, biofilm formation and secretion of secondary metabolites**

299 Sequencing of populations obtained from the day 42 co-incubation revealed 54 and 65 nsSNPs in  
300 adapted and non-adapted populations, respectively. Gene functions of nsSNPs in coenzyme  
301 metabolism, lipid metabolism, cell motility and secondary metabolite production occurred solely  
302 within the amoeba-adapted population, while COGs representing inorganic ion transport and  
303 energy production were over-represented in the non-adapted population (Fig 1). Phenotypic  
304 assays of random isolates from the adapted and non-adapted populations confirmed loss of  
305 function in many traits associated with these genes. For example, amoeba-adapted isolates  
306 showed reductions in twitching and swimming motility from days 3 to 42 and a decrease in  
307 swarming motility for day 3 and 24 isolates, but not for the day 42 isolates (Fig 2). In addition,  
308 there was a decrease in planktonic growth rate and biofilm formation by amoeba-adapted isolates

309 compared to non-adapted isolates (Fig 3). It is possible that the loss of biofilm is a result of  
310 selection against flagella or adhesive pili as these surface structures are immunogenic and act as  
311 ligands for phagocytes, including amoeba (21, 22). In fact, a large number of *P. aeruginosa*  
312 isolates from CF patients also lack flagella and pili and these mutants are resistant to  
313 phagocytosis by macrophage (23).

314 There were also a number of nsSNPs in genes relating to secretion of secondary metabolites in  
315 the adapted population. Phenotypic assays revealed that pyoverdine secretion was significantly  
316 reduced in the adapted isolates as early as day 3 and remained low throughout the later time  
317 points (Fig 4). Loss of pyoverdine in *P. aeruginosa* in chronic cystic fibrosis infections has also  
318 been reported (24). In addition, we observed an overall decrease in production of rhamnolipids,  
319 however, this was only a subset of the isolates tested. Unlike other traits that were largely or  
320 completely lost, decreases in rhamnolipid secretion were variable, implying that there may be a  
321 weaker selective pressure against this phenotype during co-adaptation.

### 322 **Uptake by and survival in amoeba and immune phagocytes**

323 Results presented here reveal that amoeba-adapted isolates are taken up less readily and have  
324 increased intracellular survival in *A. castellanii* and RAW264.7 macrophage cells compared to  
325 non-adapted isolates, although the exact mechanisms are not known (Fig 5 and 7). Similarly, we  
326 saw reduced internalization of amoeba-adapted isolates by human neutrophils (Fig 8). The loss  
327 of immunogenic flagella and pili may contribute to reduced uptake (25), as well as a reduction in  
328 chemotaxis due to mutations in chemotaxis genes in all amoeba-adapted populations.

329 Protozoa have been reported to release dissolved free amino acids and other nutrients when  
330 grazing on bacterial prey (26). A reduction in chemotaxis would decrease the encounter of  
331 predator and prey since normally *P. aeruginosa* is attracted to amoeba where it attaches to the  
332 surface of the amoeba. Likewise changes in LPS also contribute to host avoidance, enhancing  
333 fitness of amoeba-adapted strains in the presence of amoeba or macrophage. Interestingly,  
334 PA3349 encoding a protein necessary for flagella-mediated chemotaxis was mutated in all  
335 amoeba-adapted lineages and is needed for acute but not for chronic *P. aeruginosa* infections  
336 (27, 28).

337 The finding that fitness gains from adapting to amoeba could be similarly conferred to  
338 interactions with macrophage cells, perhaps demonstrates the overlaps in traits used by *P.*  
339 *aeruginosa* to interact with both host types. Much work has been done to show that specialist  
340 intracellular pathogens such as *Legionella pneumophila* can evade the defenses of both amoeba  
341 and macrophage cells during endocytosis in order to form an intracellular replication niche (29).  
342 *P. aeruginosa* is more of an environmental generalist than an intracellular pathogen and has not  
343 been observed to form intracellular replication vacuoles, even though it has been recovered from  
344 within environmental amoeba (30). In addition, intracellular replication has been described in  
345 non-phagocytic epithelial cells and is dependent on a functional type-3 secretion system (31). In  
346 the amoeba co-adapted isolates, there was a general decrease rather than increase in intracellular  
347 cell numbers, which indicates that it is unlikely that *P. aeruginosa* is replicating intracellularly  
348 under the conditions used here.

349 This work also highlights the complexities of host-pathogen interactions and potential overlaps  
350 in these processes, even between cells as far diverged as mammalian macrophage cells and  
351 single-celled amoeba. The *A. castellanii* genome contains homologues of interferon- $\gamma$ -inducible  
352 lysosomal thiol reductase enzyme (GILT), interferon inducible GTPase, and the NRAMP  
353 homologue, all of which play a role in antimicrobial defense in mammalian cells (32). More  
354 research is needed to determine whether these defenses play a role in *P. aeruginosa* infection and  
355 whether *P. aeruginosa* possesses mechanisms to evade such defenses in order to survive  
356 intracellularly within both phagocytic cell types.

#### 357 ***P. aeruginosa* populations co-incubated with *A. castellanii* show reduced virulence**

358 In order to investigate how constant predation pressure affects *P. aeruginosa* phenotypic and  
359 genotypic traits, we adapted *P. aeruginosa* to amoeba for 42 days. Interestingly, the amoeba-  
360 adapted isolates were less virulent in both fast and slow-kill *C. elegans* assays (Fig 9). Although  
361 the initial 3-day virulence levels were comparable, co-adaptation with amoeba for 42 days  
362 resulted in a loss of virulence against *C. elegans* by both fast kill and slow kill mechanisms. Fast  
363 and slow killing involves different virulence factors. For example, fast killing is usually due to  
364 the production and secretion of diffusible secondary metabolites, while slow killing occurs after  
365 colonization and infection of the gut (33). The production of hydrogen cyanide is the main  
366 virulence factor involved in the fast killing of *C. elegans* (34), while the regulated export of  
367 proteins is needed for slow killing (33).

368 Consistent with the reduction in *C. elegans* killing, we observed reductions in key virulence  
369 traits, such as motility, biofilm formation, and secondary metabolite production in days 24 and  
370 42 amoeba-adapted isolates. The loss of motility and secondary metabolites probably  
371 contributes directly to reduced *C. elegans* mortality. In *P. aeruginosa*, type-IV pili are involved  
372 in adherence, swarming and twitching motility, and virulence. *P. aeruginosa* mutants deficient  
373 in *pilA* and *pilT* demonstrate reduced pathogenesis in mice compared to the wild type (35).  
374 Virulence towards nematodes has been partly attributed to pyoverdine. For example, when  
375 *Pseudomonas syringae* interacted with *C. elegans*, the genes, *pvdJ* and *pvdE* that are involved in  
376 the synthesis of pyoverdine, were significantly upregulated on fast kill agar (36). A similar  
377 response was observed in *P. aeruginosa*, where ‘red death’ type killing of *C. elegans* was shown  
378 to be partly due to the production of pyoverdine (37). Additionally, *P. syringae*  $\Delta pvdJ$  and  
379  $\Delta pvdL$  mutants were unable to produce pyoverdine and an unrelated toxin, tabtoxin,  
380 demonstrated reduced AHL production and attenuated virulence against the tobacco plant host  
381 (38).

382 Rhamnolipids are quorum-sensing regulated secondary metabolites expressed in biofilms when  
383 neutrophils are present (39) that lyse macrophages, neutrophils and protozoans. If the gene is not  
384 expressed under the conditions of our co-adaptation, it may not be under strong negative  
385 selective pressures. Regulation of expression may be one mechanism that allows for the retention  
386 of certain virulence traits under predation.

387 **Commensalism as an adaptive strategy**



388 The co-adapted isolates had mutations in many virulence phenotypes, including loss of motility,  
389 slower growth and increased intracellular survival. These adaptations represent a commensal  
390 strategy that may indicate adaptation towards co-existence with amoeba. *P. aeruginosa*  
391 consistently adopts a more commensal lifestyle during adaptation to different hosts. For  
392 example, experimental evolution experiments with *C. elegans* demonstrated that *P. aeruginosa*  
393 evolved an attenuated virulence phenotype after serial passages (12). This is in contrast to other  
394 pathogens where virulence has been demonstrated to increase after serial passages (40). The  
395 decrease in acute virulence phenotypes also occurs in *P. aeruginosa* strains isolated from  
396 chronically infected CF patients (17, 41, 42).

397 In co-evolution with *C. elegans*, *lasR* and *rhlR* quorum sensing mutations occurred early in the  
398 adaptation process. In addition, *lasR* mutations are prevalent across multiple CF isolates (43).  
399 The regulatory genes *lasR* and *rhlR* control the expression of many virulence genes, and *las* and  
400 *rhl* mutants have been shown to be less virulent in models of wound infection (44). It has been  
401 proposed that pleiotropic adaptive mutations in global regulatory genes are more likely to occur  
402 than multiple mutations in individual virulence traits. Mutations in *lasR* occurred in one of the  
403 three amoeba-adapted replicates, so stronger selection may be driving the loss of individual  
404 virulence traits in the other amoeba-adapted populations. In CF lineages, *P. aeruginosa*  
405 adaptations include gains in mucoidy and antibiotic resistance, and loss of secondary metabolites  
406 and motility (17), of which the latter two were observed in the amoeba-adapted populations. The  
407 parallel losses of secondary metabolites and motility are striking and evoke the question of  
408 whether the selective forces driving these traits are the same in both systems.

409 Advantageous traits may be lost if the cost of maintaining the traits outweigh the benefits. Loss  
410 of pyoverdine in *P. aeruginosa* CF infections has been shown to be driven by social selection  
411 (45). Pyoverdine is a strong scavenger for iron and non-producing cheats retain the pyoverdine  
412 receptor and are able to uptake iron. Only when extrinsic pyoverdine is completely lost do  
413 mutations appear in the receptor genes. In our study, although there were many *pvd* mutations,  
414 we did not observe any mutations in the receptor genes, suggesting that social selection may also  
415 be at play here. It is also possible that other avenues of iron uptake are preferentially utilized  
416 (46), as iron uptake occurs via *hemO* in late CF strains (47).

417 Strong negative selection against traits could also occur due to host recognition and the need for  
418 evasion by pathogens. Flagellin is the site of recognition by mammalian toll-like receptors,  
419 resulting in immune activation (22), and the site where *A. castellanii* binds *P. aeruginosa* before  
420 it is endocytosed (21). Additionally, flagellin and TLR-independent loss of motility has been  
421 shown to significantly reduce phagocytic uptake by mammalian immune cells (48), and may  
422 explain why loss of motility is such a strong selection factor in the co-adaption study presented  
423 here and in CF lineages. Several findings presented here support predator avoidance as a  
424 selection pressure. The parental *P. aeruginosa* strain exhibits chemotaxis and rapidly swims  
425 towards and are taken up by amoeba and macrophage cells within seconds of exposure.  
426 However, amoeba-adapted isolates do not attach to the surface of the amoeba. This is supported  
427 by experiments showing reduced uptake of amoeba-adapted populations by amoeba and  
428 macrophage. Loss of flagella and motility is therefore adaptive for the purpose of predator  
429 avoidance. Additionally, many chemotaxis mutants were detected in the population genomic  
430 data. For example, *pctB* and PA3349 were mutated in all three independent experimental

431 amoeba-adapted populations. *pctB* is a methyl-accepting chemotaxis protein with a high affinity  
432 to glutamine (49), which has been shown to be involved in chemotaxis to wounded airway  
433 epithelial cells (50). The loss of chemotaxis in the amoeba-adapted strains would be consistent  
434 with predator avoidance.

435 In this study, it has been demonstrated for the first time that adaptation to a more commensal  
436 lifestyle may also confer benefits in an infectious context for a generalist pathogen, for it is clear  
437 that although amoeba-adapted cells are less virulent, they are still capable of invading and  
438 colonizing the *C. elegans* model. Similarly, adapted CF strains have been shown to be equally as  
439 capable as environmental strains of infecting a new host in a mouse model (51). Although  
440 amoeba may be thought of as training grounds for the formation of virulence traits, they may  
441 also be grounds for a more ‘chronic’ co-existence.

## 442 **Materials and methods**

### 443 **Organisms and growth conditions**

444 *P. aeruginosa* strain DK1 used for this study was initially obtained from a Danish CF patient  
445 (P30M0) (18). Unless otherwise stated, *P. aeruginosa* DK1 strain and population-derived  
446 isolates were grown in 10 mL lysogeny broth (LB<sub>10</sub>, BD Biosciences, USA) at 37 °C with  
447 shaking at 200 rpm. *A. castellanii* was obtained from the American Type Culture Collection  
448 (ATCC 30234) and was routinely maintained axenically in peptone-yeast-glucose (PYG)  
449 medium (20 g protease peptone, 5 g yeast extract, and 50 mL 2 M glucose L<sup>-1</sup>) at room

450 temperature. Prior to use in experiments, *A. castellanii* was passaged and washed twice with 1 ×  
451 phosphate buffered saline (PBS; Sigma-Aldrich, USA) solution to remove PYG media. *C.*  
452 *elegans* N2 Bristol was maintained on nematode growth medium (NGM) (per liter; 2.5 g Bacto-  
453 Peptone (BD Biosciences, USA), 3 g NaCl, 7.5 g agar, 1 mL 5 mg mL<sup>-1</sup> cholesterol, 1 mL 1 M  
454 MgSO<sub>4</sub>, 1 M CaCl<sub>2</sub>, and 25 mL 1 M potassium phosphate buffer at pH 6) fed with *E. coli* OP50.

455 RAW 264.7 macrophage cell lines (ATCC TIB-71) were grown in Dulbecco's modified Eagle  
456 Medium (DMEM; Thermo Fisher, USA) with 10 % fetal bovine serum (FBS) at 37 °C with 5 %  
457 CO<sub>2</sub>. Before use, cells were washed with PBS and treated with trypsin briefly before gentle  
458 detachment by scraping. Cells were then centrifuged at 1000 × *g* for 1 min and resuspended in  
459 experimental media before use.

#### 460 ***P. aeruginosa* and *A. castellanii* co-incubation**

461 Overnight cultures of *P. aeruginosa* grown in was centrifuged at 4000 × *g* for 5 min and washed  
462 twice with 1 × M9 salts solution (Sigma-Aldrich, USA; per litre, 6.78 g Na<sub>2</sub>HPO<sub>4</sub>, 3 g H<sub>2</sub>PO<sub>4</sub>, 1 g  
463 NH<sub>4</sub>Cl, 0.5 g NaCl). *A. castellanii*, at a concentration of 1 × 10<sup>3</sup> cells mL<sup>-1</sup>, was seeded onto the  
464 surface of 25 cm<sup>2</sup> tissue culture flasks with 0.2 µm vented caps filled with 10 mL 1 × complete  
465 M9 salts + 0.01% glucose. To maintain a strong selective pressure from amoeba, 100 µL of *A.*  
466 *castellanii* and *P. aeruginosa* was taken from percussed, 3-day-old established flasks and added  
467 to new flasks containing *A. castellanii* every 3 d. Three independent populations of *P.*  
468 *aeruginosa* with *A. castellanii* were established (amoeba-adapted populations).

469 In parallel with the co-incubation experiment, *P. aeruginosa* were maintained without *A.*  
470 *castellanii*. Briefly, *P. aeruginosa* was diluted to a cell concentration of  $1 \times 10^2$  cells mL<sup>-1</sup> and  
471 added to tissue culture flasks containing 10 mL  $1 \times$  complete M9 + 0.01 % glucose. From these  
472 flasks, 100  $\mu$ L of 3-day-old established *P. aeruginosa* culture was added to flasks containing  
473 fresh media every 3 d. Three independent populations of *P. aeruginosa* were established ( $-$  A  
474 populations).

475 Prior to re-inoculation and sampling, the biomass of each population was measured by  
476 spectrophotometry (Infinite<sup>®</sup> M200, Tecan, Switzerland) at 600 nm. The number of *A.*  
477 *castellanii* within each amoeba-adapted population were enumerated using inverted microscopy  
478 (Zeiss Axio Observer.Z1 inverted wide-field).

#### 479 **Isolation of intracellular *P. aeruginosa* populations**

480 On days 3, 24 and 42, flasks containing *A. castellanii* (amoeba-adapted) were percussed until the  
481 amoebae detached and 1mL of the culture media was filtered through a 3  $\mu$ m cellulose acetate  
482 membrane (Merck, Germany) to retain the *A. castellanii*. *A. castellanii* were resuspended in 5  
483 mL of  $1 \times$  M9 salts and pelleted at  $4000 \times g$  for 5 min before resuspension in 100  $\mu$ L  $1 \times$  M9  
484 salts solution. *A. castellanii* were lysed by the addition of 100  $\mu$ L of 1 % Triton  $-X$  for 1 min,  
485 the mixture was then pelleted and washed twice with 900  $\mu$ L of  $1 \times$  M9 salts. The cell pellet was  
486 resuspended in 1 mL of 70 % LB<sub>10</sub> + 30 % glycerol and stored at  $-80$  °C. The same treatment  
487 was applied to the *P. aeruginosa* cells from the non-adapted populations.

## 488 **Sequencing of *P. aeruginosa* populations and computational tools**

489 *P. aeruginosa* populations were sequenced to determine genotypic changes that occurred in  
490 response to co-adaptation with amoeba. Genomic DNA was extracted from the parental wild  
491 type strain, and each amoeba-adapted and non-adapted population derived from days 3 and 42  
492 using the QIAamp DNA mini kit (Qiagen, Venlo, Netherlands) according to manufacturer's  
493 instructions. Sequencing libraries were prepared using the TruSeq DNA sample preparation kit  
494 (Illumina, San Diego, CA, USA), and sequenced on a MiSeq (Illumina, USA).

495 Reads were aligned to the *P. aeruginosa* PAO1 reference genome using CLC Genomics  
496 Workbench 9 (CLC Bio, Aarhus, Denmark). SNPs and small insertions and deletions (indels)  
497 were called using the probabilistic variant detection analysis, and mutations that were also in the  
498 parental strain were filtered out. Genes that contained SNPs in > 25% of the total gene reads  
499 were selected for functional analysis using the Database for Annotation, Visualization and  
500 Integrated Discovery (DAVID) v6.8 functional tools (52, 53). Gene lists were uploaded onto the  
501 DAVID website (<https://david.ncifcrf.gov/>) and annotations were limited to *P. aeruginosa*. A  
502 functional annotation table was compiled for amoeba adapted populations obtained from day 42  
503 of the experiment (Table 1).

## 504 **Isolation of adapted strains**

505 To facilitate further phenotypic analysis, *P. aeruginosa* cells obtained from amoeba-adapted and  
506 non-adapted populations on days 3, 24 and 42 were plated onto LB<sub>10</sub> agar and incubated

507 overnight at 37°C. Ten colonies were randomly selected from each population using a numbered  
508 grid and a random number generator. These isolates were stored in 1 mL 70 % LB<sub>10</sub> + 30 %  
509 glycerol at -80 °C.

## 510 **Assessment of surface colonization and planktonic growth**

511 To determine if adaptation with *A. castellanii* altered surface colonization by *P. aeruginosa*, the  
512 biomass of attached cells was quantified by crystal violet staining as previously described (54).  
513 Briefly, overnight cultures of each isolate were added to 96 well plates containing 100 µL 1 ×  
514 M9 + 0.4 % glucose. Plates were incubated at room temperature with agitation at 80 rpm for 24  
515 h. To separate the suspended biomass from the attached biomass, each well was washed once  
516 with 1 × PBS. Cells attached to the plate surface were stained with 200 µL of 0.3 % crystal  
517 violet and incubated for 20 min, after which unbound crystal violet was removed by washing 3  
518 times with 1 × PBS. Crystal violet was liberated from the cells with 300 µL of 10 mL of  
519 absolute ethanol. The absorbance of the crystal violet was measured with a spectrophotometer at  
520 590 nm (Infinite<sup>®</sup> M200, Tecan, Switzerland) in triplicate.

521 The planktonic growth rate of each isolate was assessed by adding log phase bacterial cultures to  
522 96 well plates containing 200 µL of 1 × M9 + 0.01 % glucose and incubating with agitation at 80  
523 rpm for 18 h at 37°C. The suspended biomass within each well was transferred to a fresh plate  
524 and measured by spectrophotometry (OD<sub>600 nm</sub>) (Infinite<sup>®</sup> M200, Tecan, Switzerland). The  
525 specific growth rate was determined by applying the formula  $\mu = 2.303 ((\log OD_2) - (\log$

526  $OD1)/(t2-t1)$ ). Assessment of the planktonic growth rate was performed in triplicate for each  
527 isolate,  $n = 30$  for each time and treatment.

## 528 **Motility assays**

529 Twitching, swarming and swimming motility were assessed as previously described, using  
530 motility agar (20 mM  $NH_4Cl$ , 12 mM  $Na_2HPO_4$ , 22 mM  $KH_2PO_4$ , 8.6 mM  $NaCl$ , 1 mM  $MgSO_4$ ,  
531  $100 \mu M CaCl_2$ ,  $2 g L^{-1}$  Dextrose,  $5 g L^{-1}$  casamino acids) containing 1, 0.5 or 0.3 % wt vol<sup>-1</sup>  
532 agarose (Bacto™, BD Biosciences, USA), respectively (55, 56). Five milliliters of motility agar  
533 were added into the wells of 6 well plates and dried under laminar flow for 1 h. Isolates were  
534 inoculated into the center of the well using  $10 \mu L$  pipette tips, either to the base of the plate for  
535 assessment of twitching motility or mid-agar for assessment of swimming and swarming.

536 Twitching and swarming plates were incubated at room temperature for 48 h and swimming  
537 plates were incubated for 24 h prior to imaging with a digital camera (Canon EOS 600D digital  
538 single-lens reflex (DSLR) mounted on a tripod, to allow for phenotypic characterization of the  
539 resulting colonies and comparative endpoint twitch, swarm and swim distances. Determination  
540 of the zone of motility was semi-quantitatively analyzed using ImageJ image analysis software.

541 Motility was assessed in triplicate ( $n = 3$ ).

## 542 **Quantification of pyoverdine**

543 To determine if adaptation with amoeba (3, 24 and 42 d) affects the production of pyoverdine,  
544 isolates were grown overnight in 1 mL  $LB_{10}$  media. Cells were removed by centrifugation at



545 5200 × g for 5 min and the absorbance of the supernatant was determined with a  
546 spectrophotometer (Infinite® M200, Tecan, Switzerland) at excitation 400 nm and emission 460  
547 nm in triplicate.

#### 548 **Quantification of rhamnolipids**

549 The orcinol method (57) was used to quantify the production of rhamnolipid biosurfactant of  
550 nine randomly selected adapted and non-adapted isolates from the day 42 population. Briefly,  
551 overnight *P. aeruginosa* LB cultures were diluted to OD<sub>600</sub> 0.01 in 25 mL of AB minimal media  
552 (58) supplemented with 2 g glucose and 2 g casamino acids L<sup>-1</sup> and grown overnight at 37 °C  
553 with shaking at 200 rpm. The cell density was determined (OD<sub>600 nm</sub>) before filtration and  
554 extraction of crude rhamnolipid from the supernatant two times using diethyl ether (7 mL). The  
555 organic layer was collected, combined, and concentrated in a vacuum concentrator (SpeedVac,  
556 Thermo Scientific) at 0 °C for 1 h followed by 2 h at 25 °C, until white solids formed. The solids  
557 were resuspended in 500 µL of water and 50 µL of this solution was mixed with 450 µL of  
558 freshly prepared orcinol (0.19 % in 53 % H<sub>2</sub>SO<sub>4</sub>). Samples were incubated at 80 °C for 30 min  
559 and allowed to cool at room temperature for 15 min before quantification of absorbance (OD<sub>421</sub>).  
560 The absorbance was normalized to cell concentration (OD<sub>600 nm</sub>) for each sample and a factor of  
561 2.5 was applied to convert values from a rhamnose standard curve to rhamnolipid concentration  
562 (59).

#### 563 **Nematode survival assay**

564 To determine if *P. aeruginosa* adaptation to *A. castellanii* altered bacterial virulence, we tested  
565 the survival of *C. elegans* sp. Bristol N2 after feeding on *P. aeruginosa*. Axenic *C. elegans* were  
566 obtained via the egg-bleach synchronization method, plated onto NGM agar and fed with heat-  
567 killed *Escherichia coli* OP50. L4 stage worms were re-suspended in 1× M9 salts solution and 10  
568 - 30 worms were drop plated onto 35 mm dishes containing 2 mL fast or slow kill agar (33)  
569 containing lawns of pre-established *P. aeruginosa* obtained from amoeba-adapted or non-  
570 adapted populations. Plates were incubated at 22 °C and worm numbers were scored by  
571 microscopy at 0, 4, 8, 24 and 48 h for fast kill assays, and once per day for slow kill assays.  
572 Nematode toxicity was tested using 9 randomly selected *P. aeruginosa* isolates from each  
573 treatment and from times 3 and 42 d. Nematode survival assays were repeated twice  
574 independently, and each experiment was performed in triplicate.

### 575 **Fluorescent tagging of isolates**

576 To prepare fluorescently-tagged strains of *P. aeruginosa* obtained from amoeba-adapted and  
577 non-adapted populations, two isolates were randomly selected from the 42 d population and  
578 grown overnight at 37 °C in LB broth. Electroporation was performed as previously described  
579 (60). One milliliter of *P. aeruginosa* at a cell density of  $1 \times 10^8$  cells mL<sup>-1</sup> was pelleted and  
580 washed twice with 300 mM sucrose. The expression tag carrying plasmid pUC18-TR6K-mini-  
581 Tn7T-Gm-GFP (0.5 µg) (expresses a green fluorescent protein *gfp*; emission 488 nm/excitation  
582 509 nm) (61) or pUC18T-miniTn7T-Gm-Mcherry (0.5 µg) (expresses a red fluorescent protein  
583 mCherry emission 587 nm/excitation 610 nm) (62) was mixed with 1 µg pTNS1 helper plasmid  
584 and 300 µl resuspended bacteria, in a 2-mm-gap electroporation cuvette. This mixture was

585 electroporated at 1.8kV/25 $\mu$ F/2100  $\Omega$ , 2.5kV cm<sup>-1</sup> in a Gene Pulser apparatus (BIO-RAD,  
586 Hercules, CA, USA). Cell recovery was performed in ice-cold super optimal broth with  
587 catabolite repression media (SOC) (10 mM NaCl, 2.5m M KCl, 10m M MgCl<sub>2</sub>, 10m M MgSO<sub>4</sub>,  
588 20 g L<sup>-1</sup> tryptone, 5 g L<sup>-1</sup> yeast extract + 2% glucose. Cells were incubated with shaking for 3h  
589 at 37 °C. One hundred microliters of culture were plated onto LB<sub>10</sub> plates supplemented with  
590 200 ug mL<sup>-1</sup> gentamicin to select for GFP and mCherry transformants. Bacterial stocks were  
591 derived from a single transformed colony.

## 592 **Competition assays**

593 To determine if prior exposure of *P. aeruginosa* to amoeba increased competitiveness when  
594 grown with amoeba, a competition assay was performed. One isolate from the 42 d amoeba  
595 adapted population and one isolate from the 42 d – A population were fluorescently tagged as  
596 previously described. *A. castellanii*, at a cell concentration of 1  $\times$  10<sup>5</sup> cells mL<sup>-1</sup> was added to 24  
597 well plates (Falcon) in 450  $\mu$ L 1  $\times$  M9 salts + 0.01 % glucose solution. Overnight cultures of  
598 GFP or mCherry-labelled *P. aeruginosa* were grown in LB<sub>10</sub> broth supplemented with 200  $\mu$ g  
599 gentamicin at 37 °C with agitation at 200 rpm. The amoeba adapted::*gfp* and – A::*mCherry*  
600 isolate or the amoeba adapted ::*mCherry* and the – A::*gfp* isolate were mixed in equal proportion  
601 and added to the wells containing amoeba to a final bacterial cell concentration of 2  $\times$  10<sup>6</sup> cells  
602 mL<sup>-1</sup>. Each experiment was conducted in triplicate. The plates were incubated at room  
603 temperature with agitation at 60 rpm for 48 h before imaging on a Zeiss Z1 inverted wide field  
604 microscope. Acquired images were deconvoluted in Autoquant X3 (Bitplane) before

605 quantification of the relative red and green fluorescence in the field of view using Imaris 8  
606 (Bitplane).

### 607 **Growth of *P. aeruginosa* populations in amoeba supernatant**

608 To investigate whether fitness differences were due to enhanced growth by utilizing resources  
609 released by amoeba, nine randomly selected day 42 adapted and non-adapted *P. aeruginosa*  
610 isolates were grown in media supplemented with 50 % amoeba supernatant in order to compare  
611 their growth rates. Amoeba supernatant was obtained by growing *A. castellanii* in M9 salts  
612 minimal media + 0.04 % glucose with heat killed *P. aeruginosa* (made by incubating overnight  
613 cultures at 65 °C for 3 h and plating on LB agar to check that no live cells remain) for 3 d, and  
614 then filtering the suspension through an 0.22 µm filter (Pall, USA). Overnight cultures of *P.*  
615 *aeruginosa* isolates grown in LB were adjusted to the same optical density (OD<sub>600 nm</sub>) and added  
616 to amoeba supernatant or M9 salts + 0.04 % glucose. Planktonic growth rates were quantified  
617 from optical density readings (OD<sub>600 nm</sub>) using a Tecan microplate reader as previously  
618 described.

### 619 **Uptake and intracellular survival of *P. aeruginosa* populations in macrophages**

620 To investigate the dynamics of uptake and intracellular survival of 42 d +A and -A *P. aeruginosa*  
621 populations within macrophages, overnight LB cultures of adapted and non-adapted *P.*  
622 *aeruginosa* populations were added to RAW264.7 macrophage cells ( $5 \times 10^4$  cells/well in 96-  
623 well tissue culture plates) in DMEM without FBS at a multiplicity of infection (MOI) of 100:1.

624 The infected cells were incubated at 37 °C with 5 % CO<sub>2</sub>. After co-incubation for 1 h, the media  
625 was removed and replaced with media containing 100 µg mL<sup>-1</sup> gentamicin to kill extracellular  
626 bacteria. Macrophage were washed with PBS and lysed at 3, 5, 7, 12, and 18h post-infection and  
627 CFU counts were performed to enumerate surviving intracellular cells. Propidium iodide  
628 (ThermoFisher LIVE/DEAD Cell Viability kit) staining was done to determine the state of the  
629 host cells 24h post-infection.

### 630 **Uptake and survival of *P. aeruginosa* populations in the presence of neutrophils**

631 *P. aeruginosa* (4 adapted and 3 non-adapted) strains from overnight culture were washed once in  
632 PBS then diluted in PBS (OD=0.1, ~1x10<sup>8</sup>) and resuspended in complete media (RPMI + 2%  
633 heat inactivated autologous plasma) to experimental concentrations just prior to infection.  
634 Neutrophils were isolated from whole blood, collected from healthy donors in lithium heparin  
635 vacutainer tubes and separated using polymorphprep (axis shield) and centrifugation. RBCs were  
636 hypotonically lysed and neutrophils washed in HBSS (without Ca<sup>+</sup> or Mg<sup>+</sup>). Neutrophils were  
637 counted and resuspended at their final concentration in complete media. In a 96-well plate,  
638 neutrophils were added to wells for challenge (neutrophil+) and complete media added to control  
639 wells (neutrophil-). *P. aeruginosa* was added to both PMN+ and PMN- wells at a MOI of 100:1  
640 and incubated for 1 h at 37°C, 5% CO<sub>2</sub>. After co-incubation for 1 h bacterial survival was  
641 determined by serial dilution and plating on LB for enumeration. Uptake was determined by  
642 media removal and replacement with media containing 100 µg mL<sup>-1</sup> gentamicin to kill  
643 extracellular bacteria. At the experiment endpoint a sample of infection was taken and lysed in a  
644 new 96 well plate, followed by serial dilution and plating onto LB agar. CFUs were determined

645 by counting and percent inoculum determined as [CFU of neutrophil + wells/CFU neutrophil-  
646 wells x 100]. Counts were performed in triplicate and results are the pooled Means  $\pm$  SEM from  
647 individual experiments using 3 different donors.

## 648 **Human Ethics**

649 Ethics for whole blood collection was obtained from the University of Wollongong Human  
650 research Ethics Committee (HREC # 08/250).

## 651 **Statistical analyses**

652 Phenotypic differences between *P. aeruginosa* isolates obtained from amoeba-adapted and non-  
653 adapted populations at specific time points (3, 24 and 42 d) were determined by ANOVA, with  
654 amoeba adaptation (with or without *A. castellanii*) as a fixed factor and adaptation time (3, 24,  
655 42 d) as a random factor. Multiple testing was conducted using the Tukey Post-hoc Test. All  
656 phenotypic data were log transformed ( $\ln(x+1)$ ) prior to analysis to improve normality. *P*-  
657 values  $< 0.05$  were considered significant. Nematode survival curves were constructed with  
658 GraphPad Prism v 6.0 using the Kaplan-Meier method. Differences between nematode survival  
659 after exposure to *P. aeruginosa* isolates from amoeba- adapted or non-adapted populations were  
660 determined using log-rank tests with significance given to *p*-values  $< 0.05$ . Differences between  
661 neutrophil uptake and survival of amoeba-adapted and non-adapted strains were analyzed via  
662 student's T tests.

663 **Table 1** Non-synonymous SNPs and gene deletions in genes associated with motility and  
 664 secondary metabolism that occurred solely in amoeba-adapted 42 d populations

| <b>Gene</b>         | <b>Functional annotation</b>        | <b>Frequency % (population #)</b> | <b>Locus: SNP <sup>(a)</sup></b>   | <b>Amino acid substitution <sup>(b)</sup></b> |
|---------------------|-------------------------------------|-----------------------------------|------------------------------------|-----------------------------------------------|
| <b>Motility</b>     |                                     |                                   |                                    |                                               |
| <i>flgF</i> /PA1081 | Flagellar basal-body rod            | 55.17 (1)                         | NP_249772.1:<br>c.562G>T           | p.Glu188*                                     |
| <i>flgH</i> /PA1083 | Flagellar L-ring protein precursor  | 34.62 (1)                         | NP_249774.1:<br>4:c.87G>T          | p.Gly163Cys                                   |
| <i>flgK</i> /PA1086 | Flagellar hook-associated protein 1 | 42.31 (2)                         | NP_249777.1:<br>c.1182C>G          | p.Tyr394*                                     |
|                     |                                     | 96.43 (3)                         | NP_249777.1:<br>c.794delA          | p.Asn266fs                                    |
| <i>fimV</i> /PA3115 | Motility                            | 27.78 (2)                         | NP_251805.1:<br>c.1219A>C          | p.Thr407Pro                                   |
| <i>ctpL</i> /PA4844 | Chemotaxis                          | 38.46 (1)                         | NP_253531.1:<br>c.463A>C           | p.Thr155Pro                                   |
| <i>pilM</i>         | Type IV fimbrial biogenesis         | 46.43 (2)                         | NP_253731.1:<br>c.576_577delG<br>T | p.Gln192fs                                    |

|                             |                                              |           |                                                  |                        |
|-----------------------------|----------------------------------------------|-----------|--------------------------------------------------|------------------------|
| <i>pilN</i>                 | Type IV fimbrial<br>biogenesis               | 39.53 (1) | NP_253730.1:<br>c.442G>T                         | p.Glu148*              |
| <i>pilT</i>                 | Twitching motility                           | 25.53 (3) | NP_249086.1:<br>c.562_573delG<br>CGCTGCGCT<br>CG | p.Ser191_Arg19<br>4del |
| <b>Secondary metabolism</b> |                                              |           |                                                  |                        |
| <i>yfiH/ PA4543</i>         | Multi-copper<br>polyphenol<br>oxidoreductase | 29.41 (2) | NP_253233.1:<br>c.77T>G                          | p.Val26Gly             |
| <i>yafE/PA3119</i>          | Methyltransferase<br>activity                | 38.89 (1) | NP_251809.2:<br>c.401T>G                         | p.Val134Gly            |
|                             |                                              | 25 (3)    | NP_251809.2:<br>c.401T>G                         | p.Val134Gly            |
| <i>pvdD</i>                 | Pyoverdine<br>synthetase D                   | 30 (1)    | NP_251089.1:<br>c.1582T>G                        | p.Leu528Val            |
|                             |                                              | 33.33 (2) | NP_251089.1:<br>c.2141T>G                        | p.Val714Gly            |
| <i>pvdJ/PA2400</i>          | Pyoverdine<br>biosynthetic<br>process        | 25 (3)    | NP_251090.2:<br>c.5665C>G                        | p.Arg1889Gly           |



665 <sup>a</sup>SNPs are indicated by the accession number within their codon context, in the order: nucleotide  
666 N in protein coding sequence; codon population non-adapted > codon population amoeba-  
667 adapted. c. indicates coding reference sequence; del indicates gene deletion.  
668 <sup>b</sup>p. indicates protein reference sequence; Arg = arginine, Asn = asparagine, Cys = cysteine, Gln =  
669 glutamine, Glu = glutamic acid, Gly = glycine, Leu = leucine, Ser = serine, Thr = threonine, Tyr  
670 = tyrosine, Val = valine.  
671 \*indicates translation termination (stop) codon; fs indicates frameshift;

## 672 **Acknowledgments**

673 The authors would like to acknowledge support from The itthree Institute at the University of  
674 Technology Sydney, Sydney, Australia, the Australian Research Council Discovery Project  
675 (DP170100453) and by the National Research Foundation and Ministry of Education Singapore  
676 under its Research Centre of Excellence Program to the Singapore Centre for Environmental Life  
677 Sciences Engineering, Nanyang Technological University.

678

## 679   **References**

- 680   1.       Casadevall A, Fu MS, Guimaraes AJ, Albuquerque P. The 'amoeboid predator-fungal  
681   animal virulence' hypothesis. *J Fungi*. 2019;5(1).
- 682   2.       Casadevall A, Pirofski LA. Accidental virulence, cryptic pathogenesis, martians, lost  
683   hosts, and the pathogenicity of environmental microbes. *Eukaryot Cell*. 2007;6(12):2169-74.
- 684   3.       Steenbergen JN, Shuman HA, Casadevall A. *Cryptococcus neoformans* interactions with  
685   amoebae suggest an explanation for its virulence and intracellular pathogenic strategy in  
686   macrophages. *Proc Natl Acad Sci, USA*. 2001;98(26):15245-50.
- 687   4.       Sherr E, Sherr B. Significance of predation by protists in aquatic microbial food webs.  
688   *Anton Leeuw*. 2002;81(1):293-308.
- 689   5.       Erken M, Lutz C, McDougald D. The rise of pathogens: Predation as a factor driving the  
690   evolution of human pathogens in the environment. *Microb Ecol*. 2013;65(4):860-8.
- 691   6.       Levin BR. The evolution and maintenance of virulence in microparasites. *Emerg Infect*  
692   *Dis*. 1996;2(2):93-102.
- 693   7.       Sun S, Noorian P, McDougald D. Dual role of mechanisms involved in resistance to  
694   predation by protozoa and virulence to humans. *Front Microbiol*. 2018;9:1017.
- 695   8.       Adiba S, Nizak Cm, van Baalen M, Denamur E, Depaulis F. From grazing resistance to  
696   pathogenesis: the coincidental evolution of virulence factors. *PLoS One*. 2010;5(8):e11882.
- 697   9.       Cosson P, Zulianello L, Join-Lambert O, Faurisson F, Gebbie L, Benghezal M, et al.  
698   *Pseudomonas aeruginosa* virulence analyzed in a *Dictyostelium discoideum* host system. *Journal*  
699   *of Bacteriology*. 2002;184(11):3027-33.
- 700   10.      Levin BR, Eden CS. Selection and evolution of virulence in bacteria: an ecumenical  
701   excursion and modest suggestion. *Parasitology*. 1990;100:S103-15.

- 702 11. Alizon S, Hurford A, Mideo N, Van Baalen M. Virulence evolution and the trade-off  
703 hypothesis: history, current state of affairs and the future. *J Evol Biol.* 2009;22(2):245-59.
- 704 12. Jansen G, Crummenerl LL, Gilbert F, Mohr T, Pfefferkorn R, Thanert R, et al.  
705 Evolutionary transition from pathogenicity to commensalism: global regulator mutations mediate  
706 fitness gains through virulence attenuation. *Mol Biol Evol.* 2015;32(11):2883-96.
- 707 13. Brown SP, Cornforth DM, Mideo N. Evolution of virulence in opportunistic pathogens:  
708 generalism, plasticity, and control. *Trends Microbiol.* 2012;20(7):336-42.
- 709 14. Stover CK, Pham XQ, Erwin AL, Mizoguchi SD, Warrener P, Hickey MJ, et al.  
710 Complete genome sequence of *Pseudomonas aeruginosa* PAO1, an opportunistic pathogen.  
711 *Nature.* 2000;406(6799):959-64.
- 712 15. Weinstein RA, Gaynes R, Edwards JR. Overview of nosocomial infections caused by  
713 Gram-negative bacilli. *Clinical Infectious Diseases.* 2005;41(6):848-54.
- 714 16. Folkesson A, Jelsbak L, Yang L, Johansen HK, Ciofu O, Hoiby N, et al. Adaptation of  
715 *Pseudomonas aeruginosa* to the cystic fibrosis airway: an evolutionary perspective. *Nat Rev*  
716 *Microbiol.* 2012;10(12):841-51.
- 717 17. Winstanley C, O'Brien S, Brockhurst MA. *Pseudomonas aeruginosa* evolutionary  
718 adaptation and diversification in cystic fibrosis chronic lung infections. *Trends Microbiol.*  
719 2016;24(5):327-37.
- 720 18. Markussen T, Marvig RL, Gomez-Lozano M, Aanaes K, Burleigh AE, Hoiby N, et al.  
721 Environmental heterogeneity drives within-host diversification and evolution of *Pseudomonas*  
722 *aeruginosa*. *mBio.* 2014;5(5):e01592-14.

- 723 19. Huse HK, Kwon T, Zlosnik JEA, Speert DP, Marcotte EM, Whiteley M. Parallel  
724 evolution in *Pseudomonas aeruginosa* over 39,000 generations *in vivo*. *mBio*. 2010;1(4):e00199-  
725 10-e-17.
- 726 20. Ansari MZ, Sharma J, Gokhale RS, Monhanty D. In silico analysis of methyltransferase  
727 domains involved in biosynthesis of secondary metabolites. *BMC Bioinformatics*. 2008;9:454.
- 728 21. Preston TM, King CA. Binding sites for bacterial flagella at the surface of the soil  
729 amoeba *Acanthamoeba*. *J Gen Microbiol*. 1984;130:1449-58.
- 730 22. Ramos HC, Rumbo M, Sirard JC. Bacterial flagellins: mediators of pathogenicity and  
731 host immune responses in mucosa. *Trends Microbiol*. 2004;12(11):509-17.
- 732 23. Mahenthiralingam E, Campbell ME, Speert DP. Nonmotility and phagocytic resistance of  
733 *Pseudomonas aeruginosa* isolates from chronically colonized patients with cystic fibrosis. *Infect*  
734 *Immun*. 1994;62(2):596-605.
- 735 24. Jiricny N, Molin S, Foster K, Diggle SP, Scanlan PD, Ghoul M, et al. Loss of social  
736 behaviours in populations of *Pseudomonas aeruginosa* infecting lungs of patients with cystic  
737 fibrosis. *PLoS One*. 2014;9(1):e83124.
- 738 25. Sager B, Kaiser D. Intercellular C-signaling and the traveling waves of *Myxococcus*.  
739 *Genes & Dev*. 1994;8(23):2793-804.
- 740 26. Andersson A, Lee C, Azam F, Hagström Å. Release of amino acids and inorganic  
741 nutrients by heterotrophic marine microflagellates. *Mar Ecol Prog Ser*. 1985;23:99-106.
- 742 27. Turner KH, Everett J, Trivedi U, Rumbaugh KP, Whiteley M. Requirements for  
743 *Pseudomonas aeruginosa* acute burn and chronic surgical wound infection. *PLoS Genet*.  
744 2014;10(7):e1004518.

- 745 28. Hoboth C, Hoffmann R, Eichner A, Henke C, Schmoldt S, Imhof A, et al. Dynamics of  
746 adaptive microevolution of hypermutable *Pseudomonas aeruginosa* during chronic pulmonary  
747 infection in patients with cystic fibrosis. *J Infect Dis.* 2009;200(1):118-30.
- 748 29. Escoll P, Rolando M, Gomez-Valero L, Buchrieser C. From amoeba to macrophages:  
749 exploring the molecular mechanisms of *Legionella pneumophila* infection in both hosts. *Curr*  
750 *Top Microbiol Immunol.* 2013;376:1-34.
- 751 30. Snelling WJ, Moore JE, McKenna JP, Lecky DM, Dooley JSG. Bacterial-protozoa  
752 interactions; an update on the role these phenomena play towards human illness. *Microbes*  
753 *Infect.* 2006;8(2):578-87.
- 754 31. Angus AA, Lee AA, Augustin DK, Lee EJ, Evans DJ, Fleiszig SM. *Pseudomonas*  
755 *aeruginosa* induces membrane blebs in epithelial cells, which are utilized as a niche for  
756 intracellular replication and motility. *Infect Immun.* 2008;76(5):1992-2001.
- 757 32. Clarke M, Lohan AJ, Liu B, Lagkouvardos I, Roy S, Zafar N, et al. Genome of  
758 *Acanthamoeba castellanii* highlights extensive lateral gene transfer and early evolution of  
759 tyrosine kinase signaling. *Genome Biol.* 2013;14(2):R11.
- 760 33. Tan M-W, Rahme LG, Sternberg JA, Tompkins RG, Ausubel FM. *Pseudomonas*  
761 *aeruginosa* killing of *Caenorhabditis elegans* used to identify *P. aeruginosa* virulence factors.  
762 *Proc Natl Acad Sci USA.* 1999;96(5):2408-13.
- 763 34. Gallagher LaA, Manoil C. *Pseudomonas aeruginosa* PAO1 kills *Caenorhabditis elegans*  
764 by cyanide poisoning. *Journal Of Bacteriology.* 2001;183(21):6207-14.
- 765 35. Zollner E, Santer B, Boersma M, Hoppe H-G, Jurgens K. Cascading predation effects of  
766 *Daphnia* and copepods on microbial food web components. *Freshwater Biol.* 2003;48:2174-93.

- 767 36. Ali M, Sun Y, Xie L, Yu H, Bashir A, Li L. The Pathogenicity of *Pseudomonas syringae*  
768 MB03 against *Caenorhabditis elegans* and the Transcriptional Response of Nematicidal Genes  
769 upon Different Nutritional Conditions. *Front Microbiol.* 2016;7:805.
- 770 37. Zaborin A, Romanowski K, Gerdes S, Holbrook C, Lépine F, Long J, et al. Red death in  
771 *Caenorhabditis elegans* caused by *Pseudomonas aeruginosa* PAO1. *Proceedings of the National*  
772 *Academy of Sciences.* 2009;106(15):6327-32.
- 773 38. Taguchi F, Suzuki T, Inagaki Y, Toyoda K, Shiraishi T, Ichinose Y. The siderophore  
774 pyoverdine of *Pseudomonas syringae* pv. *tacaci* 6605 is an intrinsic virulence factor in host  
775 tobacco infection. *Journal of Bacteriology.* 2010;192(1):117-26.
- 776 39. Alhede M, Bjarnsholt T, Jensen PO, Phipps RK, Moser C, Christophersen L, et al.  
777 *Pseudomonas aeruginosa* recognizes and responds aggressively to the presence of  
778 polymorphonuclear leukocytes. *Microbiology.* 2009;155(11):3500-8.
- 779 40. Schulte RD, Makus C, Hasert B, Michiels NK, Schulenburg H. Multiple reciprocal  
780 adaptations and rapid genetic change upon experimental coevolution of an animal host and its  
781 microbial parasite. *Proceedings of the National Academy of Sciences.* 2010;107(16):7359.
- 782 41. Smith EE, Buckley DG, Wu Z, Saenphimmachak C, Hoffman LR, D'Argenio DA, et al.  
783 Genetic adaptation by *Pseudomonas aeruginosa* to the airways of cystic fibrosis patients. *Proc*  
784 *Natl Acad Sci USA.* 2006;103(22):8487-92.
- 785 42. Lore NI, Cigana C, De Fino I, Riva C, Juhas M, Schwager S, et al. Cystic fibrosis-niche  
786 adaptation of *Pseudomonas aeruginosa* reduces virulence in multiple infection hosts. *PLoS One.*  
787 2012;7(4):e35648.

- 788 43. Marvig RL, Johansen HK, Molin S, Jelsbak L. Genome analysis of a transmissible  
789 lineage of *Pseudomonas aeruginosa* reveals pathoadaptive mutations and distinct evolutionary  
790 paths of hypermutators. *PLoS Genet.* 2013;9(9):e1003741.
- 791 44. Rumbaugh KP, Griswold JA, Iglewski BH, Hamood AN. Contribution of quorum  
792 sensing to the virulence of *Pseudomonas aeruginosa* in burn wound infections. *Infect Immun.*  
793 1999;67(11):5854-62.
- 794 45. Andersen SB, Marvig RL, Molin S, Krogh Johansen H, Griffin AS. Long-term social  
795 dynamics drive loss of function in pathogenic bacteria. *Proc Natl Acad Sci U S A.*  
796 2015;112(34):10756-61.
- 797 46. Cornelis P, Dingemans J. *Pseudomonas aeruginosa* adapts its iron uptake strategies in  
798 function of the type of infections. *Front Cell Infect Microbiol.* 2013;3:75.
- 799 47. Nguyen AT, O'Neill MJ, Watts AM, Robson CL, Lamont IL, Wilks A, et al. Adaptation  
800 of iron homeostasis pathways by a *Pseudomonas aeruginosa* pyoverdine mutant in the cystic  
801 fibrosis lung. *J Bacteriol.* 2014;196(12):2265-76.
- 802 48. Amiel E, Lovewell RR, O'Toole GA, Hogan DA, Berwin B. *Pseudomonas aeruginosa*  
803 evasion of phagocytosis is mediated by loss of swimming motility and is independent of  
804 flagellum expression. *Infect Immun.* 2010;78(7):2937-45.
- 805 49. Sampedro I, Parales RE, Krell T, Hill JE. *Pseudomonas* chemotaxis. *FEMS Microbiol*  
806 *Rev.* 2015;39(1):17-46.
- 807 50. Schwarzer C, Fischer H, Machen TE. Chemotaxis and Binding of *Pseudomonas*  
808 *aeruginosa* to Scratch-Wounded Human Cystic Fibrosis Airway Epithelial Cells. *PLoS One.*  
809 2016;11(3):e0150109.

- 810 51. Bragonzi A, Paroni M, Nonis A, Cramer N, Montanari S, Rejman J, et al. *Pseudomonas*  
811 *aeruginosa* microevolution during cystic fibrosis lung infection establishes clones with adapted  
812 virulence. *Am J Respir Crit Care Med*. 2009;180(2):138-45.
- 813 52. Huang DW, Sherman BT, Lempicki RA. Bioinformatics enrichment tools: Paths toward  
814 the comprehensive functional analysis of large gene lists. *Nuc Acid Res*. 2009;37(1):1-13.
- 815 53. Huang DW, Sherman BT, Lempicki RA. Systematic and integrative analysis of large  
816 gene lists using DAVID bioinformatics resources. *Nat Protocol*. 2009;4(1):44-57.
- 817 54. O'Toole GA, R. K. Initiation of biofilm formation in *Pseudomonas fluorescens* WCS365  
818 proceeds via multiple, convergent signalling pathways: a genetic analysis. *Mol Microbiol*.  
819 1998;28:449-61.
- 820 55. Glessner A, Smith RS, Iglewski BH, Robinson JB. Roles of *Pseudomonas aeruginosa las*  
821 and *rhl* quorum-sensing systems in control of twitching motility. *Journal of Bacteriology*.  
822 1999;181(5):1623-9.
- 823 56. Köhler T, Curty LK, Barja F, van Delden C, Pechere J-C. Swarming of *Pseudomonas*  
824 *aeruginosa* is dependent on cell-to-cell signaling and requires flagella and pili. *Journal of*  
825 *Bacteriology*. 2000;182(21):5990-6.
- 826 57. Ochsner UA, Fiechter A, Reisers J. Isolation, characterization, and expression in  
827 *Escherichia coli* of the *Pseudomonas aeruginosa rhlAB* genes encoding a rhamnosyltransferase  
828 involved in rhamnolipid biosurfactant synthesis. *J Biol Chem*. 1994;269(31):19787-95.
- 829 58. Greenberg EP, Hastings JW, Ulitzur S. Induction of luciferase synthesis in *Beneckea*  
830 *harveyi* by other marine bacteria. *Arch Microbiol*. 1979;120:87-91.



- 831 59. Dobler L, de Carvalho BR, Alves Wd, Neves BC, Freire DMG, Almeida RV. Enhanced  
832 rhamnolipid production by *Pseudomonas aeruginosa* overexpressing *estA* in a simple medium.  
833 PLoS One. 2017;12(8):1-12.
- 834 60. Bloemberg GV, O'Toole GA, Lugtenberg BJJ, Kolter R. Green fluorescent protein as a  
835 marker for *Pseudomonas* spp. Appl Environ Microbiol. 1997;63(11):4543-51.
- 836 61. Lee KWK, Periasamy S, Mukherjee M, Xie C, Kjelleberg S, Rice SA. Biofilm  
837 development and enhanced stress resistance of a model, mixed-species community biofilm.  
838 ISME J. 2014;8(4):894-907.
- 839 62. Lagendijk EL, Validov S, Lamers GE, de Weert S, Bloemberg GV. Genetic tools for  
840 tagging Gram-negative bacteria with mCherry for visualization *in vitro* and in natural habitats,  
841 biofilm and pathogenicity studies. FEMS Microbiol Lett. 2010;305(1):81-90.
- 842
